# Supplementary material for: Indications and patterns of use of benzodiazepines and opioids in severe interstitial lung disease: a population-based longitudinal study
Source: PubMed Central journal article supplement — ERJ Open Res. 2021 Feb 1;7(1):00716-2020. doi: 10.1183/23120541.00716-2020 (PMC7861020; doi:10.1183/23120541.00716-2020), 2021-02-01
Supplement: 00716-2020.SUPPLEMENT.pdf [file 00716-2020.SUPPLEMENT.pdf]

## Indications and patterns of use of benzodiazepines and opioids in severe interstitial lung disease: a population-based longitudinal study

**Table S1:** Characteristics of the random sample of oxygen-dependent ILD patients prescribed benzodiazepines and/or opioids, by known or unknown indication

| Characteristics                           | Patients prescribed BDZ in the random sample |                                      | Patients prescribed opioid in the random sample |                                      |
|-------------------------------------------|----------------------------------------------|--------------------------------------|-------------------------------------------------|--------------------------------------|
|                                           | With known indications<br>(n=388)≠           | With unknown indications<br>(n=274)≠ | With known indications<br>(n=383)≠              | With unknown indications<br>(n=289)≠ |
| <b>Age (years)</b>                        | 76.1 (8.6)                                   | 76.8 (8.3)                           | 75.4 (9.1)                                      | 75.9 (9.6)                           |
| <b>Female, n (%)</b>                      | 169 (43.6)                                   | 126 (46.0)                           | 181 (47.3)                                      | 138 (47.8)                           |
| <b>FEV<sub>1</sub> % pred</b>             | 66.9 (22.7)                                  | 66.8 (23.3)                          | 65.3 (24.2)                                     | 64.8 (25.7)                          |
| <b>% missing</b>                          | 156 (40.2)                                   | 114 (41.6)                           | 161 (42.0)                                      | 129 (44.6)                           |
| <b>VC % pred</b>                          | 56.1 (19.5)                                  | 55.0 (18.6)                          | 55.7 (20.6)                                     | 55.3 (22.5)                          |
| <b>% missing</b>                          | 155 (40.0)                                   | 115 (42.0)                           | 160 (41.8)                                      | 129 (44.6)                           |
| <b>FEV<sub>1</sub>/VC</b>                 | 0.9 (0.7)                                    | 0.8 (0.1)                            | 0.8 (0.2)                                       | 0.8 (0.2)                            |
| <b>% missing</b>                          | 149 (38.4)                                   | 106 (38.7)                           | 154 (40.2)                                      | 121 (41.9)                           |
| <b>PaO<sub>2</sub> breathing air kPa</b>  | 6.7 (0.9)                                    | 6.7 (1.0)                            | 6.7 (1.0)                                       | 6.7 (0.9)                            |
| <b>% missing</b>                          | 91 (23.5)                                    | 61 (22.3)                            | 89 (23.2)                                       | 76 (26.3)                            |
| <b>PaCO<sub>2</sub> breathing air kPa</b> | 5.1 (0.9)                                    | 5.2 (0.9)                            | 5.2 (0.9)                                       | 5.2 (1.0)                            |
| <b>% missing</b>                          | 92 (23.7)                                    | 61 (22.3)                            | 91 (23.8)                                       | 77 (26.6)                            |
| <b>Median (IQR) follow-up (days)</b>      | 355 (154.5-639.5)                            | 349 (148-687)                        | 344 (141-694)                                   | 348 (158-752)                        |

Data presented as mean (standard deviation) unless otherwise stated.

*Abbreviations:* interquartile range (IQR), forced expiratory volume in 1 s (FEV<sub>1</sub>) % of predicted, vital capacity (VC) % of predicted, arterial oxygen tension (PaO<sub>2</sub>), arterial carbon dioxide tension (PaCO<sub>2</sub>) while breathing air and oxygen.

≠ *Overlap between columns:* 176 (36.3%) BDZ patients and 202 (43.0%) opioid patients in the random sample of prescriptions appear in both the known and unknown columns.

**Table S2:** Known indications for opioids and BDZ in the year before death for deceased LTOT patients.

|                            | <b>Indications n (%)</b> |                       |                |              |
|----------------------------|--------------------------|-----------------------|----------------|--------------|
| <b>Opioids</b>             |                          |                       |                |              |
| <b>Months before death</b> | <b>Pain</b>              | <b>Breathlessness</b> | <b>Anxiety</b> | <b>Other</b> |
| 12-10                      | 78 (96.3)                | 2 (2.5)               | 1 (1.2)        | 1 (1.2)      |
| 9-7                        | 97 (96.0)                | 4 (4.0)               | 0 (0)          | 1 (1.0)      |
| 6-2                        | 146 (94.8)               | 9 (5.8)               | 4 (2.6)        | 3 (2.0)      |
| 3-1                        | 199 (92.1)               | 22 (10.2)             | 7 (3.2)        | 3 (1.4)      |
| X <sup>2</sup> p-value     | 0.380                    | 0.048                 | 0.276          | 0.930        |
| <b>Benzodiazepines</b>     |                          |                       |                |              |
| <b>Months before death</b> | <b>Pain</b>              | <b>Breathlessness</b> | <b>Anxiety</b> | <b>Other</b> |
| 12-10                      | 1 (1.3)                  | 0 (0)                 | 73 (96.1)      | 4 (5.3)      |
| 9-7                        | 1 (1.1)                  | 2 (2.1)               | 89 (94.7)      | 8 (8.5)      |
| 6-2                        | 0 (0)                    | 4 (2.5)               | 156 (95.7)     | 13 (8.0)     |
| 3-1                        | 0 (0)                    | 6 (2.3)               | 255 (97.7)     | 14 (5.4)     |
| X <sup>2</sup> p-value     | 0.166                    | 0.608                 | 0.501          | 0.587        |

These data also form the basis for Figure 1 in the main manuscript.
